# Supplementary material for: Profiling Proteins and Phosphorylation Sites During T Cell Activation Using an Integrated Thermal Shift Assay
Source: PubMed Central journal article supplement (PMC11298636; doi:10.1016/j.mcpro.2024.100801), 2024-06-15
Supplement: mmc3.pdf [file mmc3.pdf]

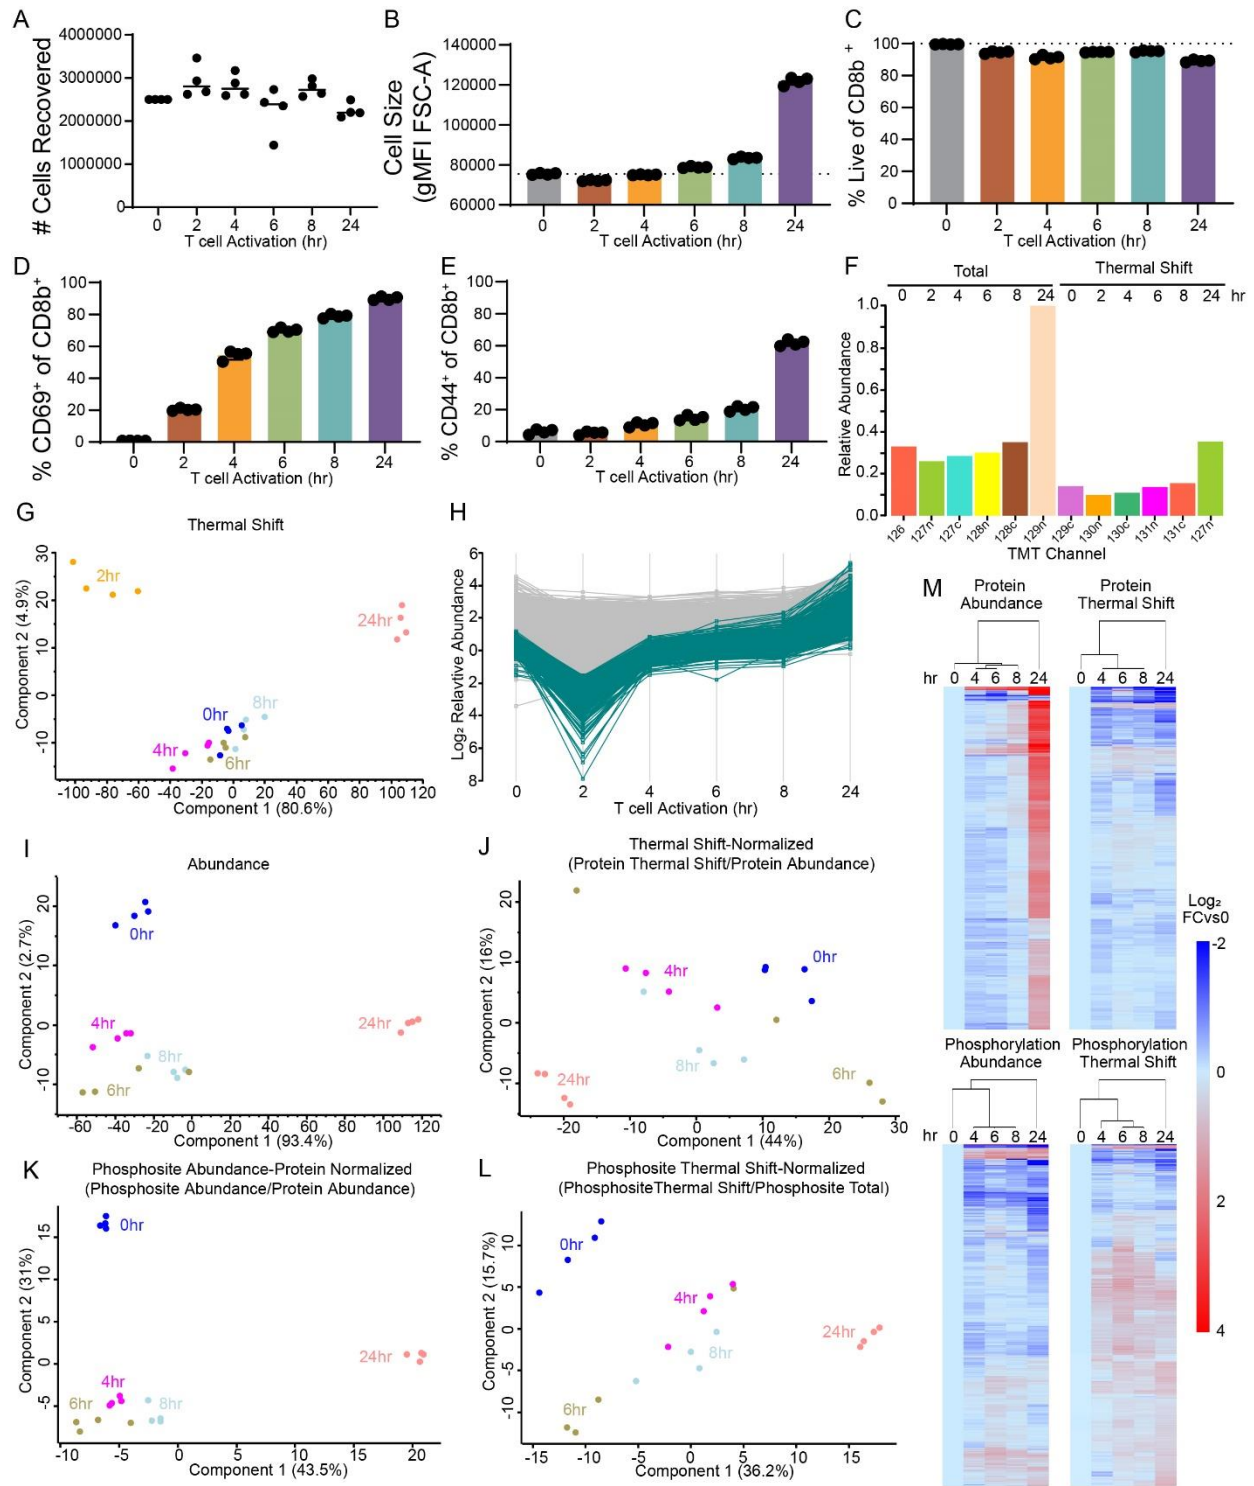

**Figure S1. Validation of T Cell Activation across Time Course.** A) The number of cells recovered; B) cell size as measured by forward scatter; C) the percentage of live cells; D) the percentage of CD8b<sup>+</sup> cells expressing CD69 (an early activation marker); and E) the percentage of CD8b<sup>+</sup> cells expressing CD44 (a late activation marker) across the 24 hr time course of T cell activation. F) TMT relative abundance of individual time points/channels from a representative MS run, showing both total peptide abundance and thermal shift. G) PCA analysis of protein thermal shift across the time course of T cell activation, showing the 2 hr time point outlier. H) Profile plot showing the Log<sub>2</sub> relative abundance for protein thermal shift across the time points, showing the 2 hr time point dropping below the limit of quantitation. PCA analysis of I) protein abundance, J) normalized protein thermal shift (protein thermal shift/protein abundance), K) protein-normalized phosphorylation site abundance (phosphorylation site abundance/protein abundance), and L) normalized phosphorylation site thermal shift (phosphorylation site thermal shift/phosphorylation site abundance). M) K-means hierarchical clustering of Log<sub>2</sub> fold change vs 0 hr for protein abundance, protein thermal shift, phosphorylation site abundance, and phosphorylation site thermal shift.

Naïve

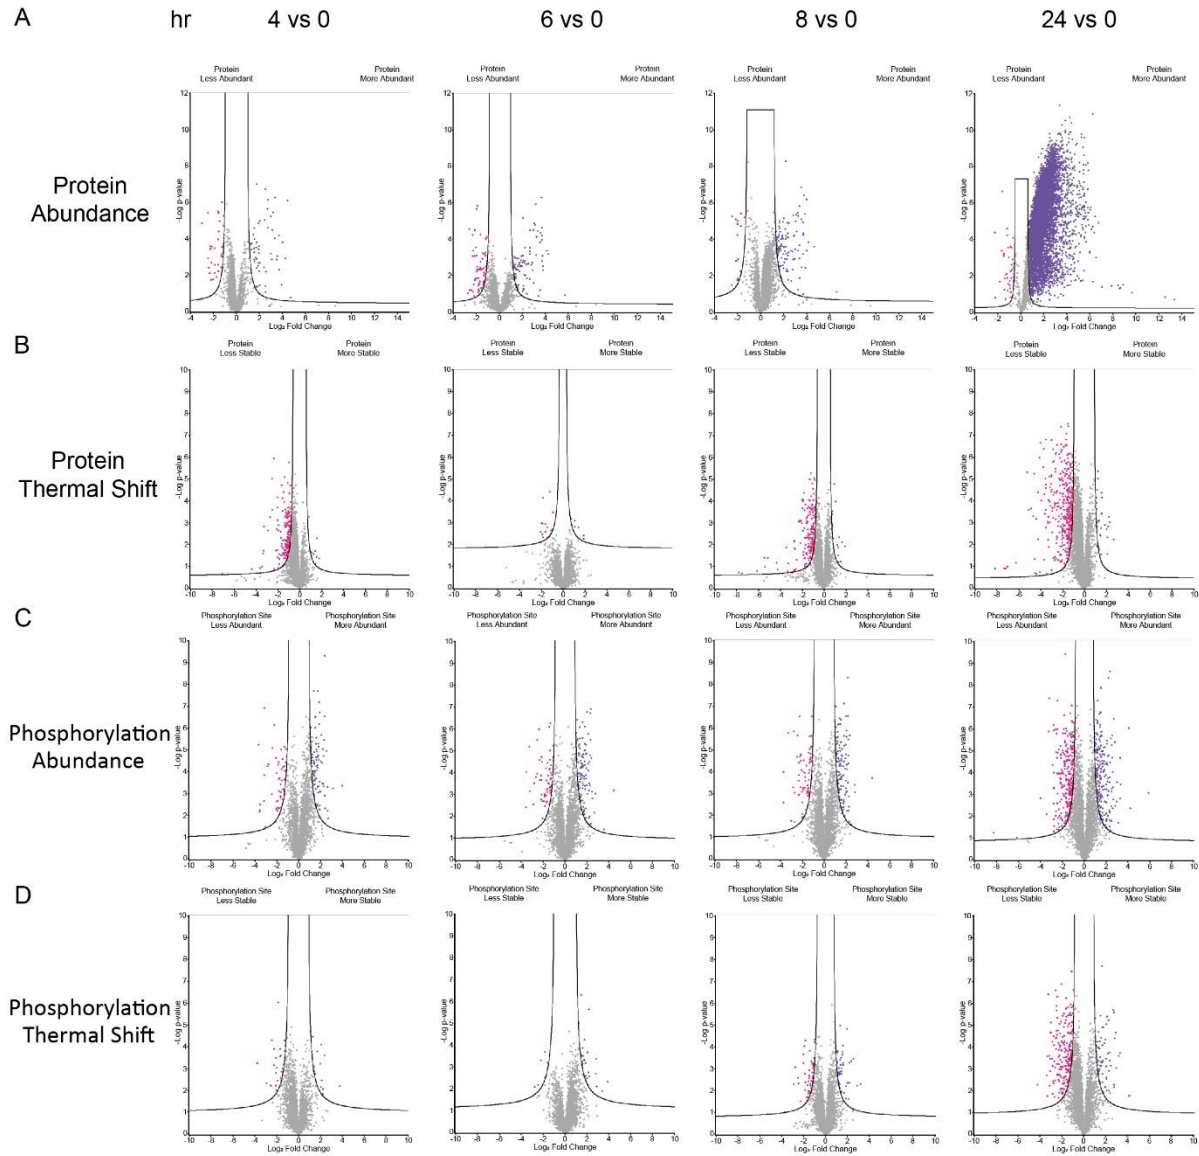

**Figure S2. Time Course Comparison to 0 hr.** Volcano plots comparing each time point to 0 hr for protein abundance (A), protein thermal shift (B), phosphorylation site abundance (C), and phosphorylation site thermal shift (D). X-axes represent  $\log_2$  fold change vs 0hr; y-axes represent  $-\log p\text{-value}$  of  $n=4$  replicates.



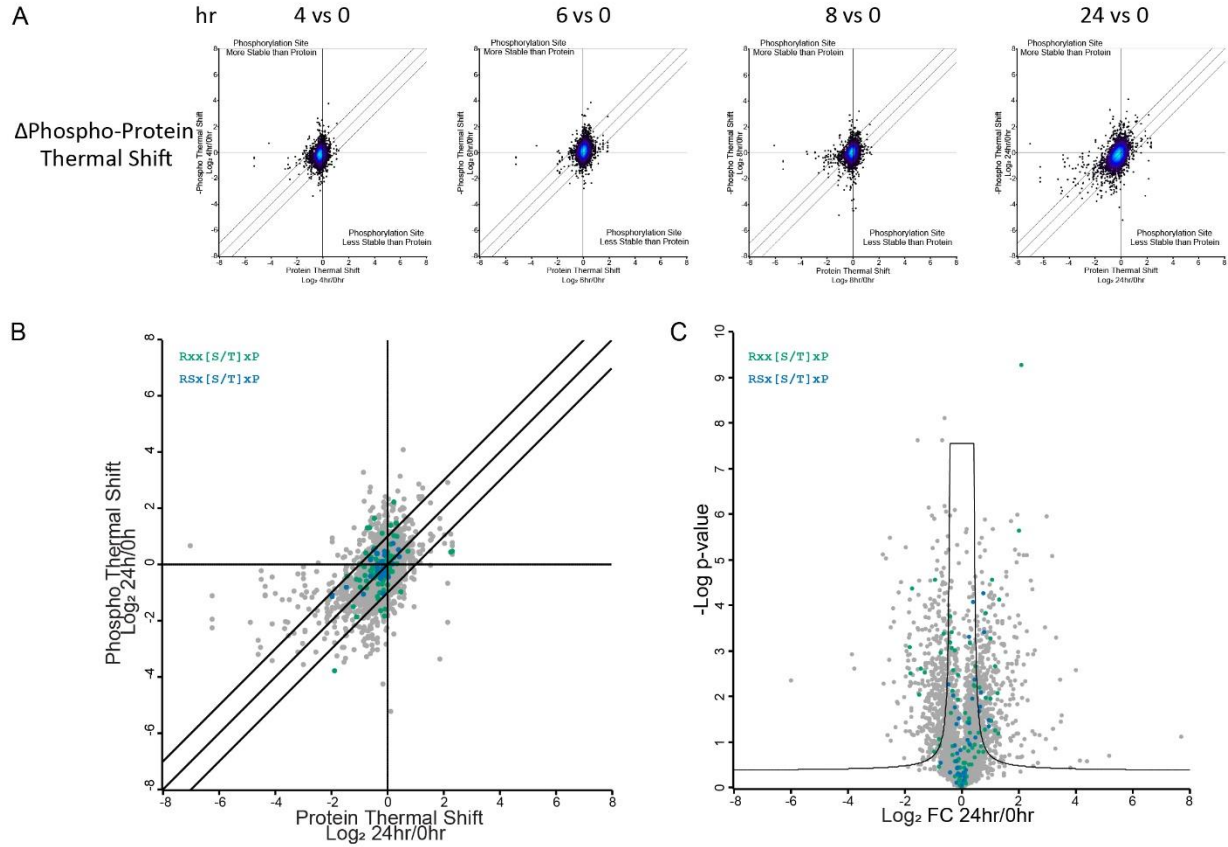

**Figure S4. Identifying Putative Functionally Meaningful Phosphorylation Sites.** A) A comparison of the phosphorylation site thermal shift at each time point versus 0 hr to the bulk protein thermal shift for each time point versus 0 hr. Lines indicate a 2-fold difference between protein and phosphorylation site thermal stability. Darker colors indicate reduced point density. Values are the mean Log<sub>2</sub> fold change of 24 hr versus 0 hr of n=4 replicates per time point. B) The phosphorylation site versus protein thermal shift at 24 hr versus 0hr (from Figure 3A), with consensus 14-3-3 binding motif phosphorylation sites highlighted. C) Volcano plot of protein-normalized phosphorylation site abundance at 24 hr versus 0 hr (from Fig S2A), with consensus 14-3-3 phosphorylation sites highlighted.

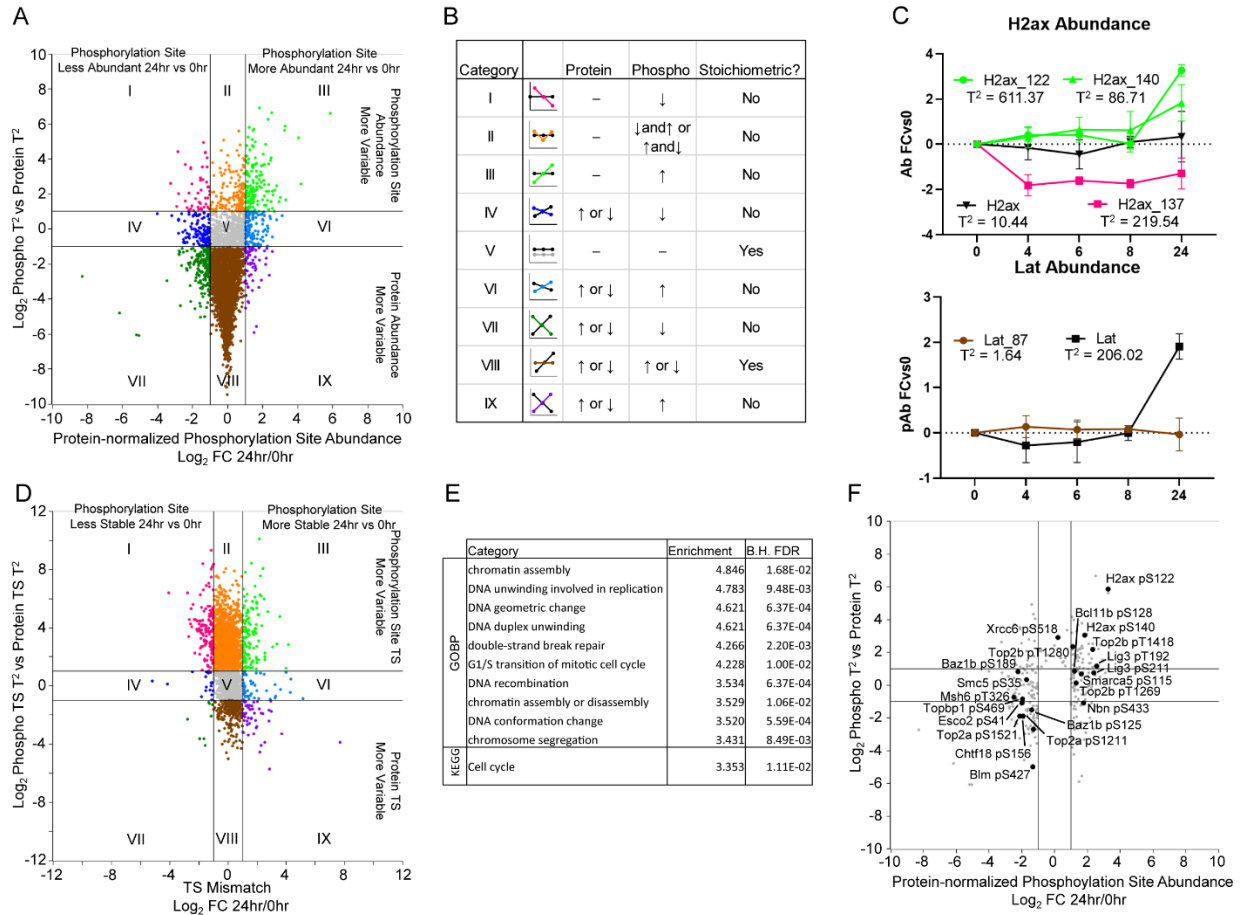

**Figure S5. Identifying Stoichiometric vs Non-stoichiometric Phosphorylation Sites.** A) Plot comparing the ratio of Hotelling  $T^2$  statistics between phosphorylation abundance and protein abundance to the protein-normalized phosphorylation site abundance  $\text{Log}_2$  fold-change at 24 hr versus 0 hr as described in Gassaway *et al.* 2021<sup>34</sup>. Phosphorylation site behavioral categories are denoted by roman numerals. B) Phosphorylation site behavioral category legend for (A), with the black lines representing changes in protein abundance across the time course, and colored lines representing changes in protein-normalized phosphorylation site abundance, and whether the change is stoichiometric (constant phosphorylation site abundance to protein abundance ratio) or non-stoichiometric (altered phosphorylation site abundance to protein abundance ratio). C) Representative traces of phosphorylation sites from different behavioral categories in (A). Category colors as in (A). Error bars represent S.E.M of  $n=4$  replicates. D) Plot similar to (A), but comparing the ratio of Hotelling  $T^2$  statistics for phosphorylation site and protein thermal shifts to the difference between phosphorylation site and protein thermal shifts. E) Category enrichment of phosphorylation sites significantly altered in both (A) and (D) (meaning sites from categories I, II, III, IV, VI, VII, and IX). F) Individual phosphorylation sites from the double-strand break repair and DNA recombination GOBP categories labelled and plotted as in (A).

A

T Cell Activation-Motif Abundance

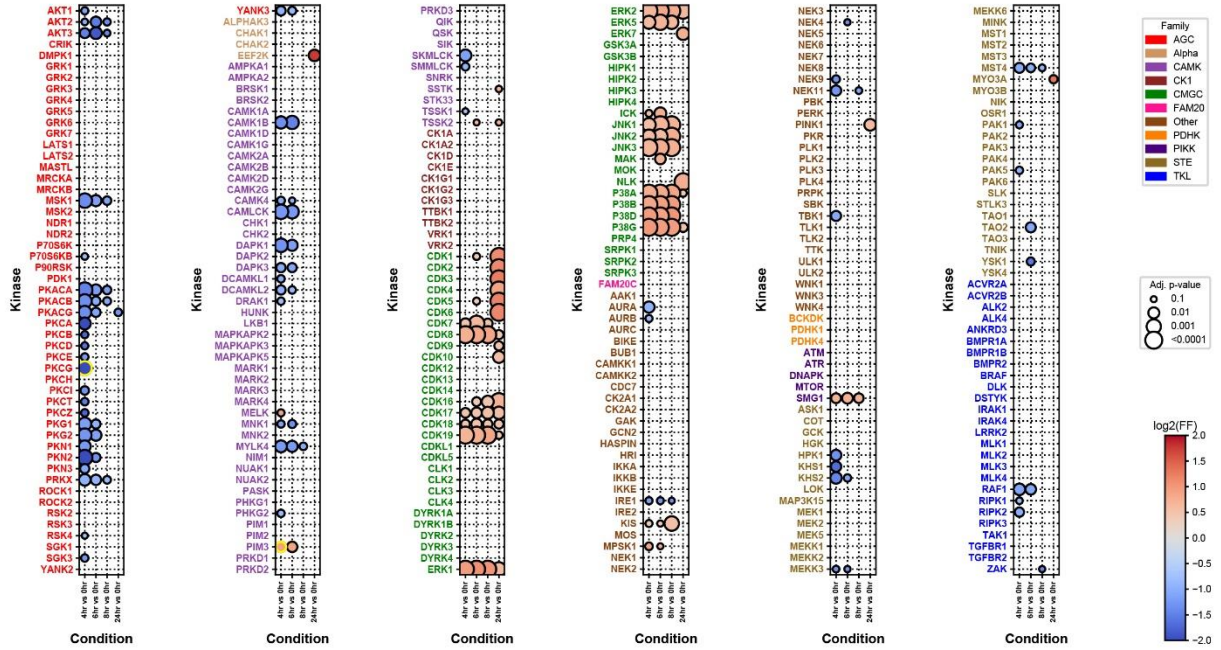

B

T Cell Activation-Motif Thermal Shift

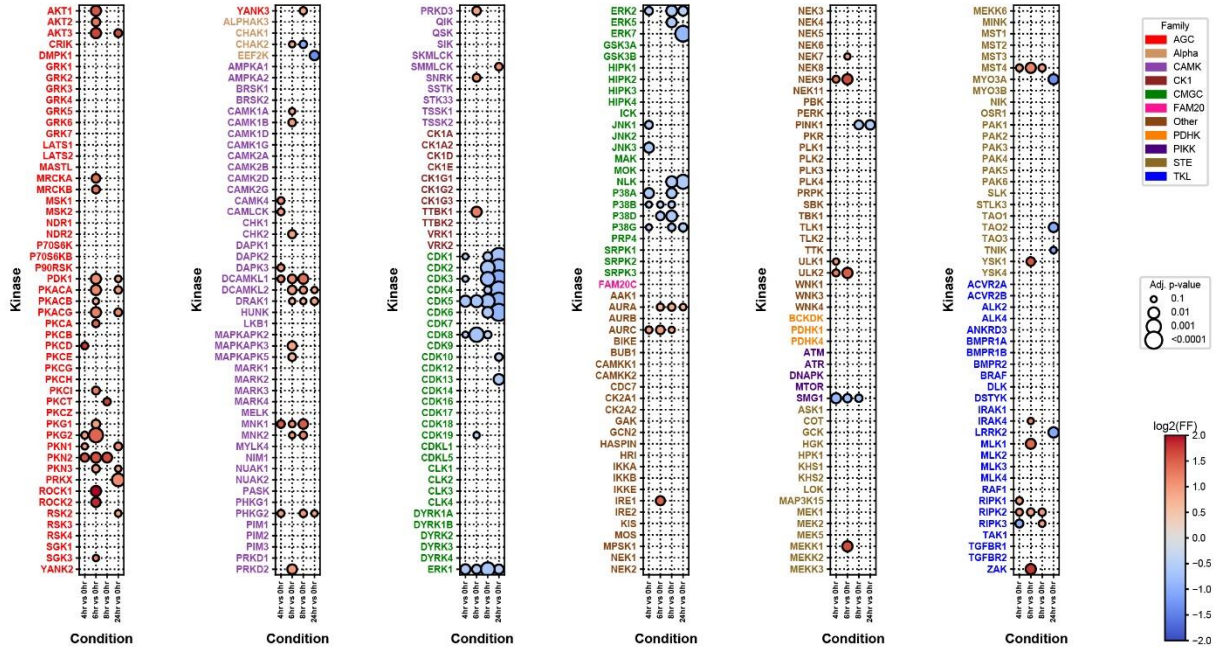

**Figure S6. Kinase Motif Enrichment Analysis of T cell Activation Phosphorylation Sites.**

Kinase motif enrichment analysis, as published in Johnson *et al.* 2023<sup>33</sup>, for phosphorylation site abundance (A) and thermal stability (B) values at each time point versus 0 hr. Label color indicates kinase family, circle color indicates enrichment factor, circle size indicates adjusted p-value.

### Jurkat Cell-Nocodazole and CDKi Treatment

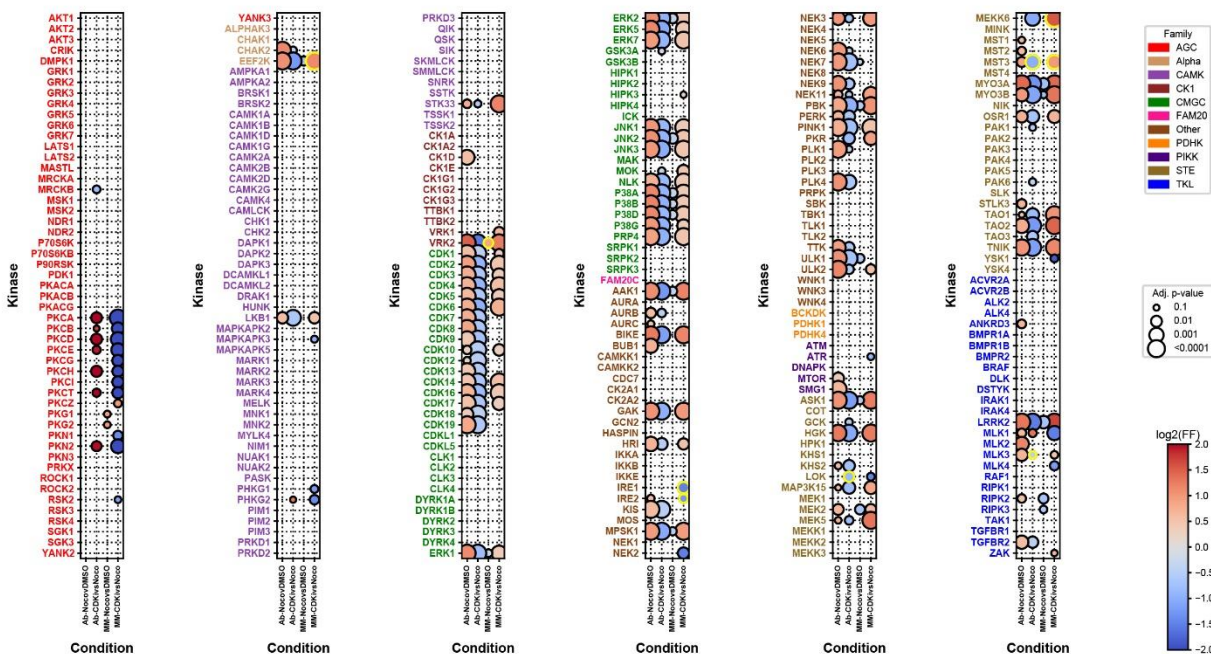

**Figure S7. Kinase Motif Enrichment Analysis of Jurkat Cells.** Kinase motif enrichment analysis, as published in Johnson *et al.* 2023<sup>33</sup>, for phosphorylation site abundance and thermal stability values for Nocodazole versus DMSO treated cells and CDKi plus Nocodazole versus Nocodazole treated cells. Label color indicates kinase family, circle color indicates enrichment factor, circle size indicates adjusted p-value.



| Abundance | Stability |       | Category                                 | Enrichment | B.H. FDR |
|-----------|-----------|-------|------------------------------------------|------------|----------|
| —         | ↑         | GOBP  | nucleosome positioning                   | 80.26      | 4.56E-03 |
|           |           |       | nucleosome assembly                      | 45.78      | 1.48E-12 |
|           |           |       | protein-DNA complex assembly             | 39.62      | 4.29E-12 |
|           |           |       | protein-DNA complex subunit organization | 33.77      | 1.91E-11 |
|           |           |       | nucleosome organization                  | 32.70      | 2.10E-11 |
|           |           |       | chromatin assembly or disassembly        | 23.41      | 1.54E-02 |
|           |           |       | cellular macromolecular complex assembly | 6.54       | 5.46E-04 |
|           |           |       | chromatin organization                   | 6.47       | 4.82E-05 |
|           |           | KEGG  | Systemic lupus erythematosus             | 41.62      | 1.07E-06 |
|           |           | Pfam  | Linker_histone                           | 149.82     | 4.62E-14 |
| Histone   | 93.64     |       | 2.40E-08                                 |            |          |
| ↑         | ↓         | GOBP  | spindle midzone assembly                 | 14.06      | 4.92E-04 |
|           |           |       | mitotic chromosome condensation          | 10.22      | 3.71E-05 |
|           |           |       | reciprocal DNA recombination             | 10.04      | 4.32E-03 |
|           |           |       | chromosome condensation                  | 9.09       | 1.21E-06 |
|           |           |       | regulation of spindle organization       | 8.78       | 9.40E-03 |
|           |           |       | DNA packaging                            | 8.43       | 8.14E-07 |
|           |           |       | protein localization to kinetochore      | 7.81       | 1.63E-02 |
|           |           |       | sister chromatid segregation             | 7.44       | 1.81E-04 |
|           |           |       | DNA biosynthetic process                 | 6.69       | 1.59E-04 |
|           |           |       | cellular response to lipid               | 6.02       | 1.90E-02 |
|           |           |       | ...                                      |            |          |
|           |           |       | DNA repair                               | 2.42       | 9.44E-06 |
|           |           | KEGG  | DNA replication                          | 4.22       | 1.19E-02 |
|           |           |       | Cell cycle                               | 2.74       | 1.19E-02 |
|           |           |       | Pyrimidine metabolism                    | 2.70       | 1.98E-02 |
|           |           | Corum | DNA polymerase alpha-primase complex     | 14.06      | 5.59E-03 |
|           |           |       | DNA synthesome complex                   | 9.84       | 3.77E-04 |
|           |           | Pfam  | Kinesin                                  | 9.14       | 1.70E-07 |
|           |           |       | Helicase_C                               | 3.06       | 6.66E-03 |

**Table S1. ITSA Category Enrichments.** A Fisher's exact test was performed for the categories of protein behavior where abundance does not change over 24 hrs but thermal stability increases (orange) and where abundance increases over 24 hrs but thermal stability decreases (purple), as defined in Fig. 2C.
